# Supplementary material for: SERE: Single-parameter quality control and sample comparison for RNA-Seq
Source: PubMed Central journal article supplement (PMC3534338; doi:10.1186/1471-2164-13-524), 2012-10-03

### **SI Table 1: SRA id and read counts for the 14 lanes of the RNA-Seq rat dataset**

### **SI Figure 1: Reanalysis of a drosophila RNA-Seq dataset using SERE reveals variation between technical replicates**

The drosophila RNA-Seq dataset (SRA id GSE17107) employed by McIntyre et al. consisted of 5 technical replicates. It was clustered using SERE and revealed 2 groups. This suggests that the 5 samples resulted from 2 libraries instead of 1 as claimed by the authors. No overdispersion is inherent within the groups. In the analysis previously conducted by McIntyre et al, Kappa was not able to pick up this inconsistency in the dataset.

### **SI Figure 2: Pearson's correlation coefficient varies with different total read counts.**

As the total number of reads decreases, the distance between the extremes of the scale decreases similarly as indicated by the scatter-plots. Thus Pearson's  $r$  becomes more prone to variations and its value decreases.

### **SI Figure 3: Dependency of Kappa statistic on the chosen bin size**

A. Kappa was 0.4109 when the singletons (exons with only one total read count) were included in the statistic.  
B. When the singletons were excluded from the analysis, the concordance improved and Kappa raised to 0.5087.  
C. When the bins were chosen tighter, Kappa decreased to 0.3018. D. Large bin sizes led to an increased concordance of 0.7272. A-D: All Kappa values represent the mean of 200 simulated RNA-Seq dataset pairs with a total read count of  $10^7$  (see Methods). The reads were randomly drawn into two subsets of equal size ( $5 \times 10^6$  reads in each sample) and the Kappa value for each pair was computed.

### **SI Figure 4: Weighted Kappa has the same limitations as Simple Kappa**

A. Contamination experiment (see description Figure 1) B. Effect of the total read count (see description Figure 2) C. Effect of unequal sample sizes (see description Figure 3). A-C All values represent the mean of 200 simulated RNA-Seq dataset pairs (perfect in silico replicates).

**SI Figure 5: Irreproducible discovery rate (IDR) for “duplicated” replicates.** The change of correspondence curve  $\psi$  (psi) on the scale of the number of observations  $t$  generated by IDR shows a straight line at 1.0 for two “duplicated” replicates suggesting perfect reproducibility. Thus, the method cannot identify the underlying dataset as underdispersed (“copy and paste” replicates).

**SI Figure 6: Irreproducible discovery rate (IDR) for a pair of in silico replicates for various total coverages per exon.** The change of correspondence curve  $\psi$  (psi) on the scale of the number of observations  $t$  shows that the ranking of lowly covered exons is less reproducible (noise level) and contributes to points above 1. By increasing the required coverage per exon, these points disappear, although they might still be within the margin of the underlying distribution type (Poisson variation).

# SI Table 1

| Condition | Animal | Lane | SRA ID    | UMRs to genome | UMRs to exons |
|-----------|--------|------|-----------|----------------|---------------|
| CONTROL   | 1      | 1    | GSM539553 | 7741514        | 5512030       |
|           |        | 2    | GSM539554 | 7692598        | 5478590       |
|           |        | 3    | GSM539555 | 7455452        | 5303998       |
|           | 2      | 1    | GSM539556 | 8107262        | 5672358       |
|           |        | 2    | GSM539557 | 8242133        | 5771421       |
|           |        | 3    | GSM539558 | 8214866        | 5743284       |
| SNL       | 1      | 1    | GSM539559 | 6989927        | 4972649       |
|           |        | 2    | GSM539560 | 8166021        | 5810044       |
|           |        | 3    | GSM539561 | 7563536        | 5377969       |
|           |        | 4    | GSM539562 | 7002557        | 4968028       |
|           | 2      | 1    | GSM539563 | 7235937        | 5234429       |
|           |        | 2    | GSM539564 | 8310193        | 6009593       |
|           |        | 3    | GSM539565 | 8274366        | 5982965       |
|           |        | 4    | GSM539566 | 7640134        | 5514301       |

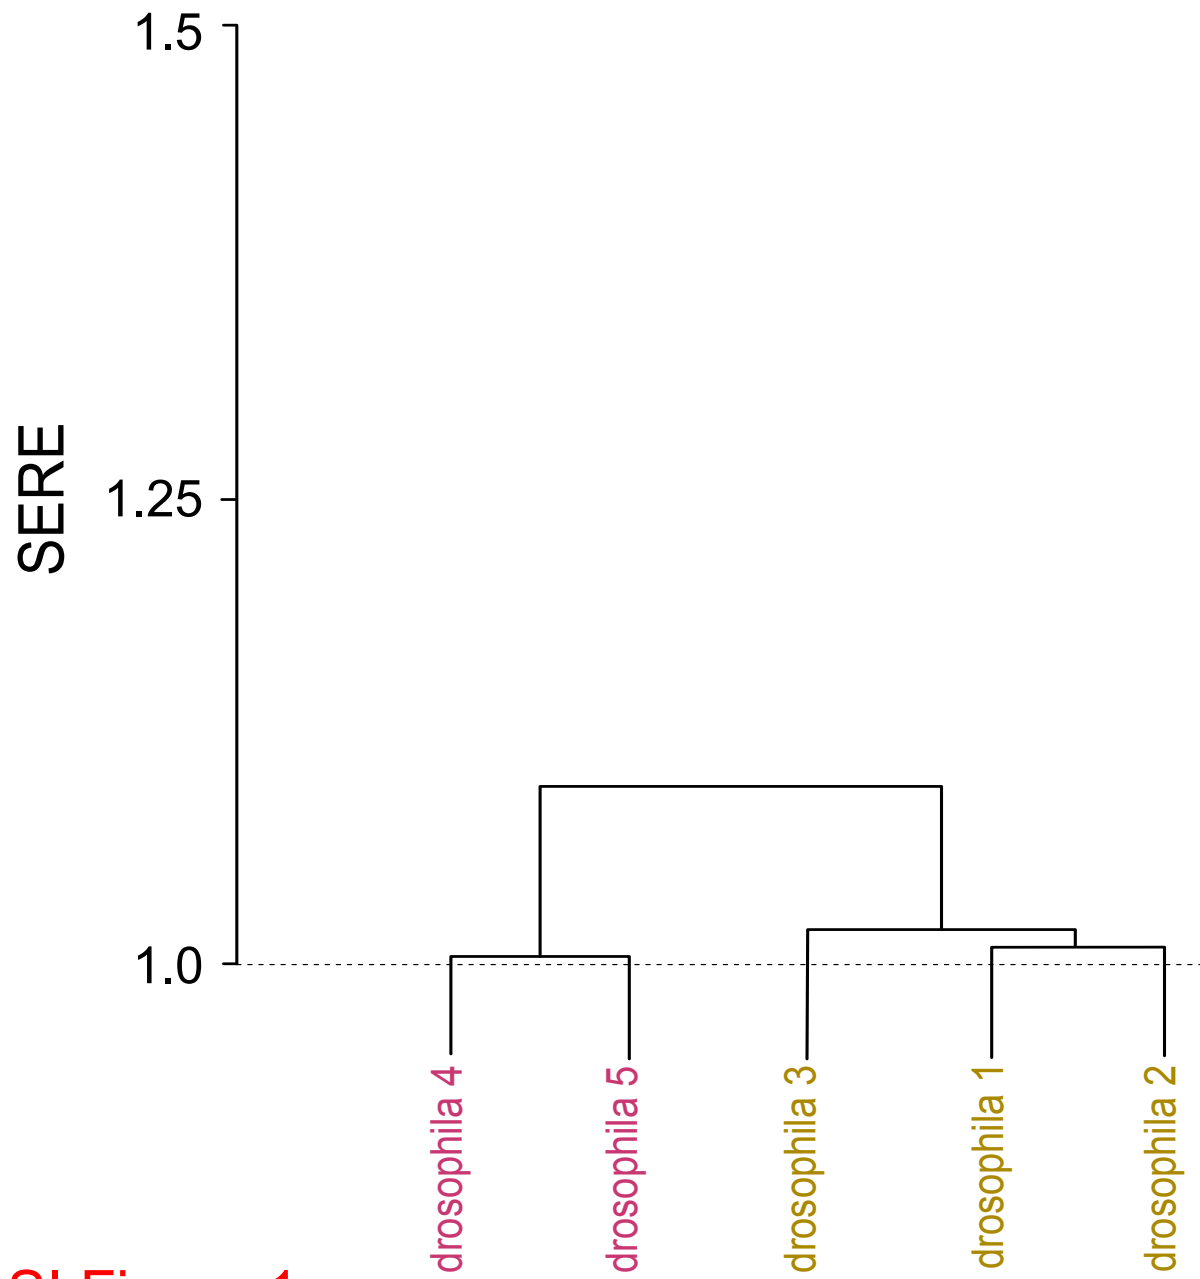

SI Figure 1

**$10 \cdot 10^6$  UMRs per sample,  $r = 0.93$**

**$2 \cdot 10^6$  UMRs per sample,  $r = 0.82$**

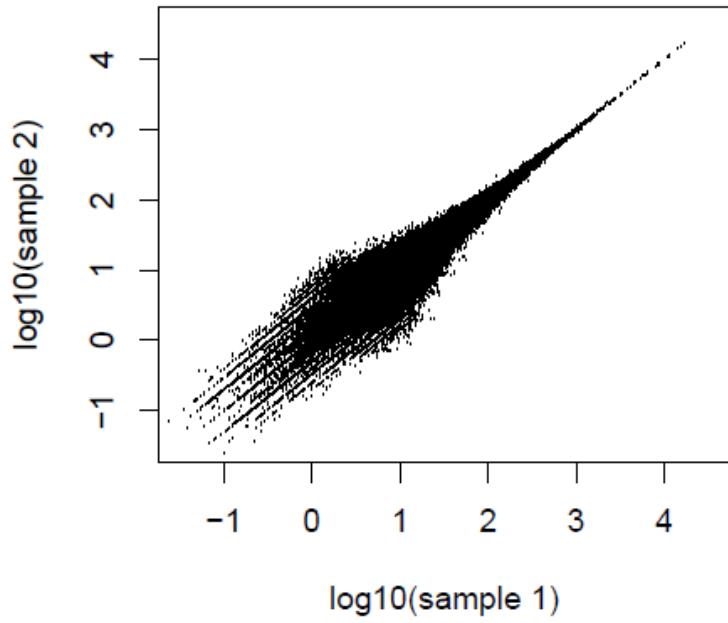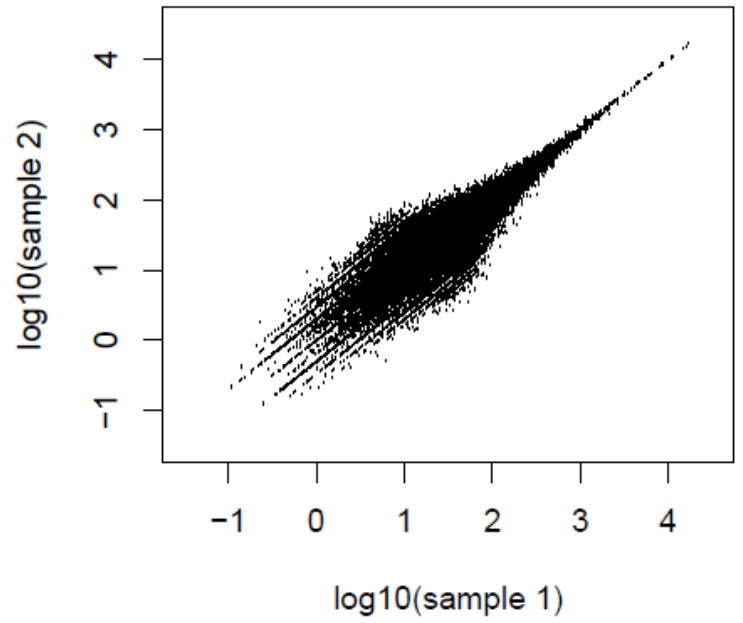

**$0.5 \cdot 10^6$  UMRs per sample,  $r = 0.71$**

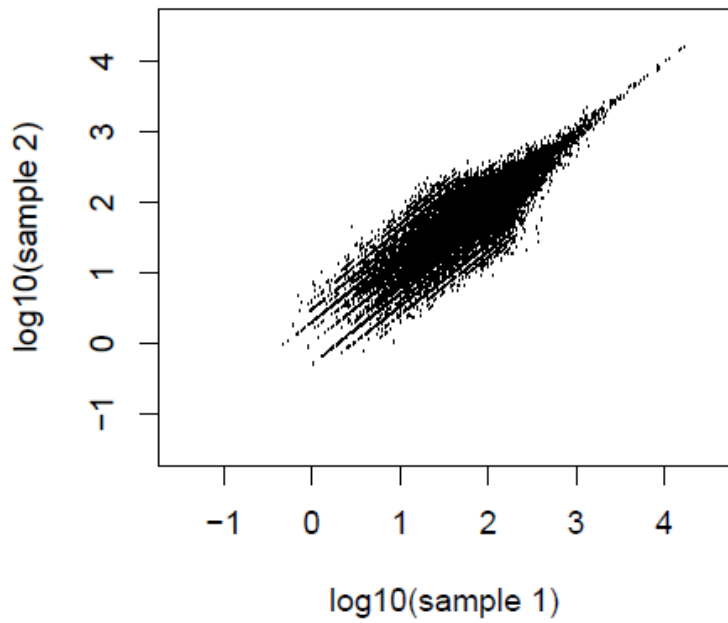

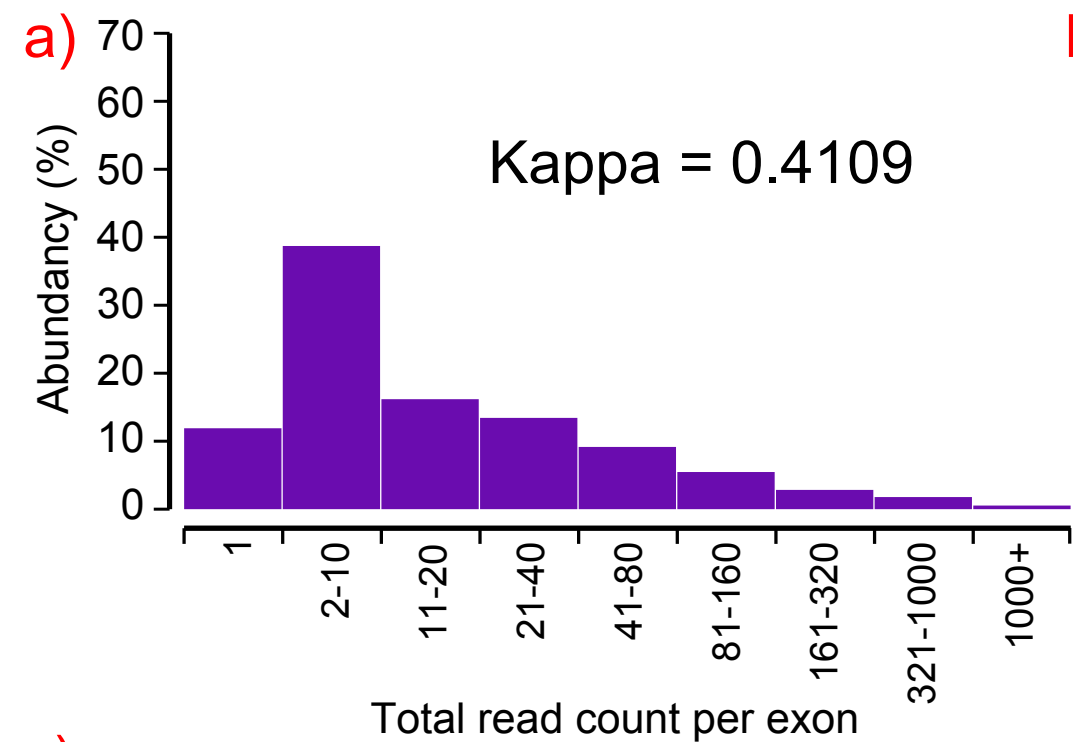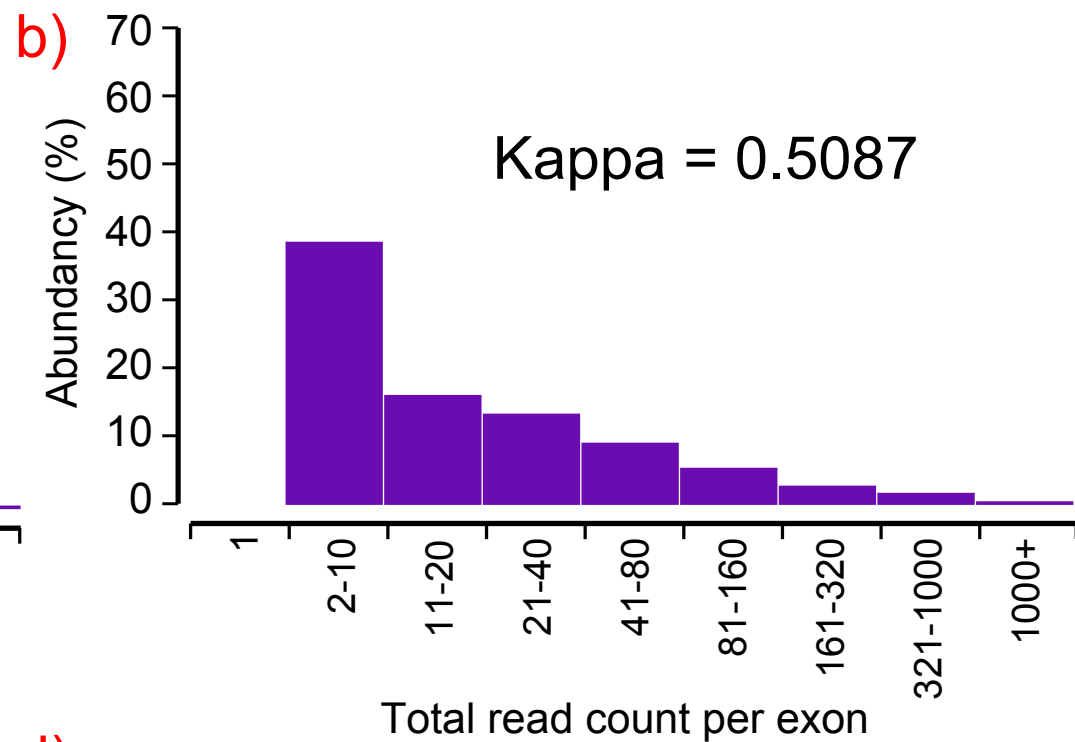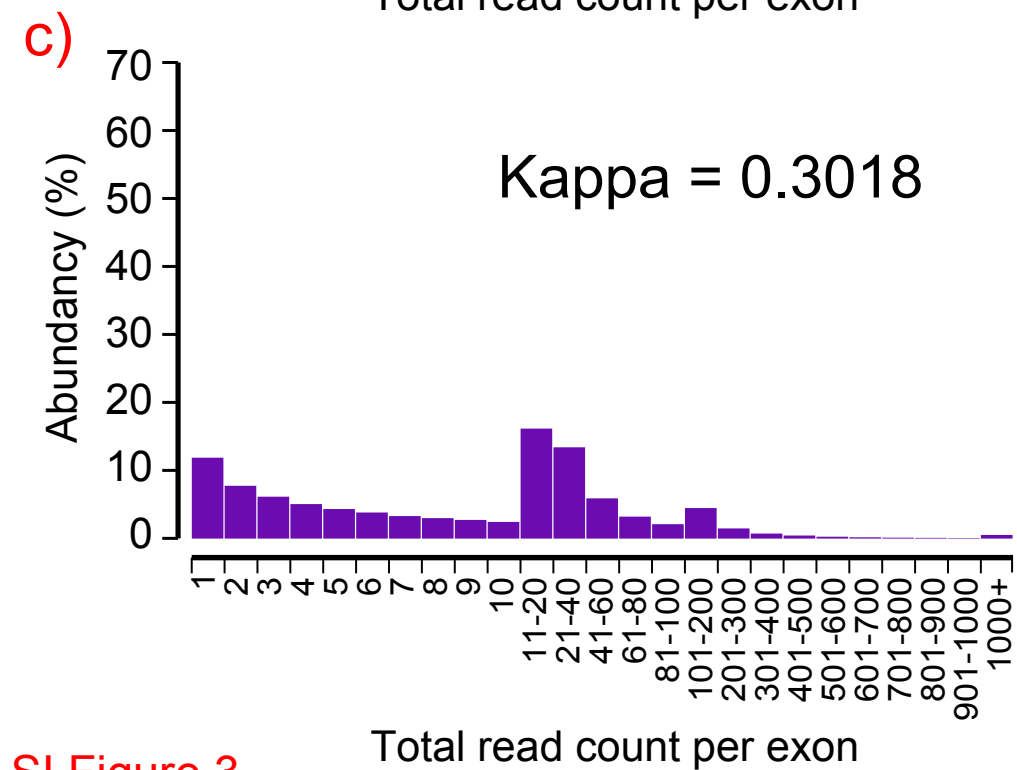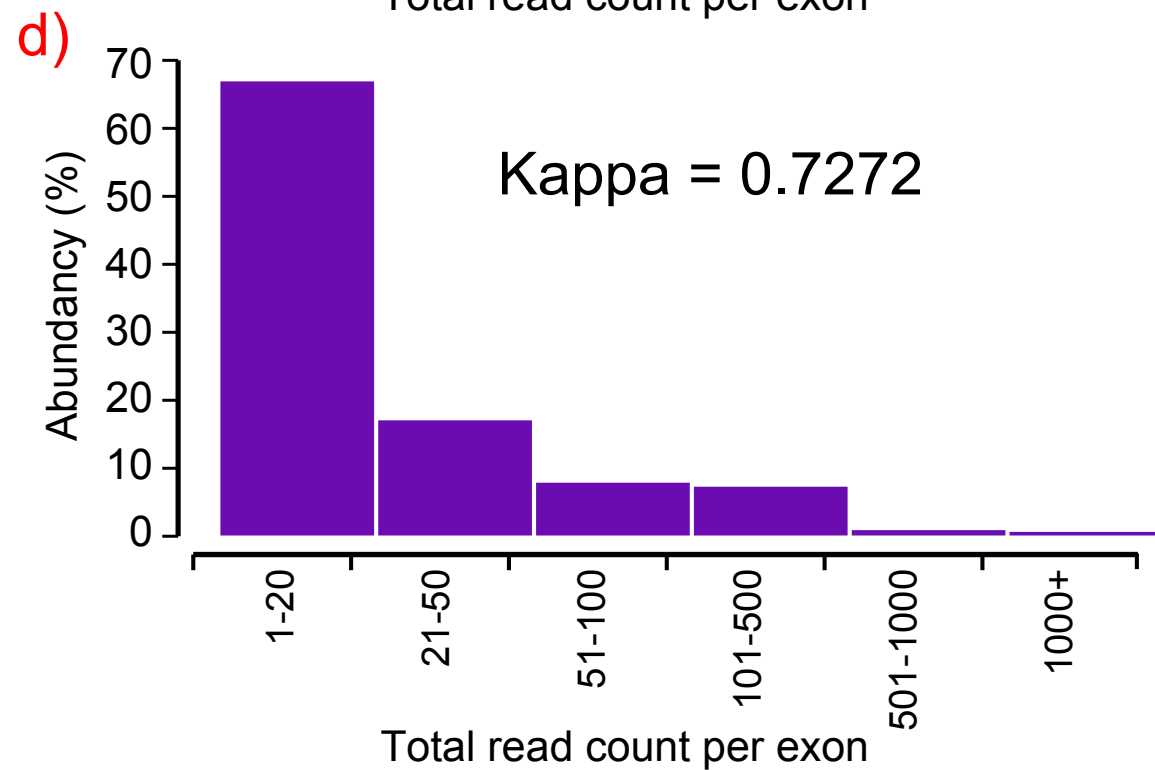

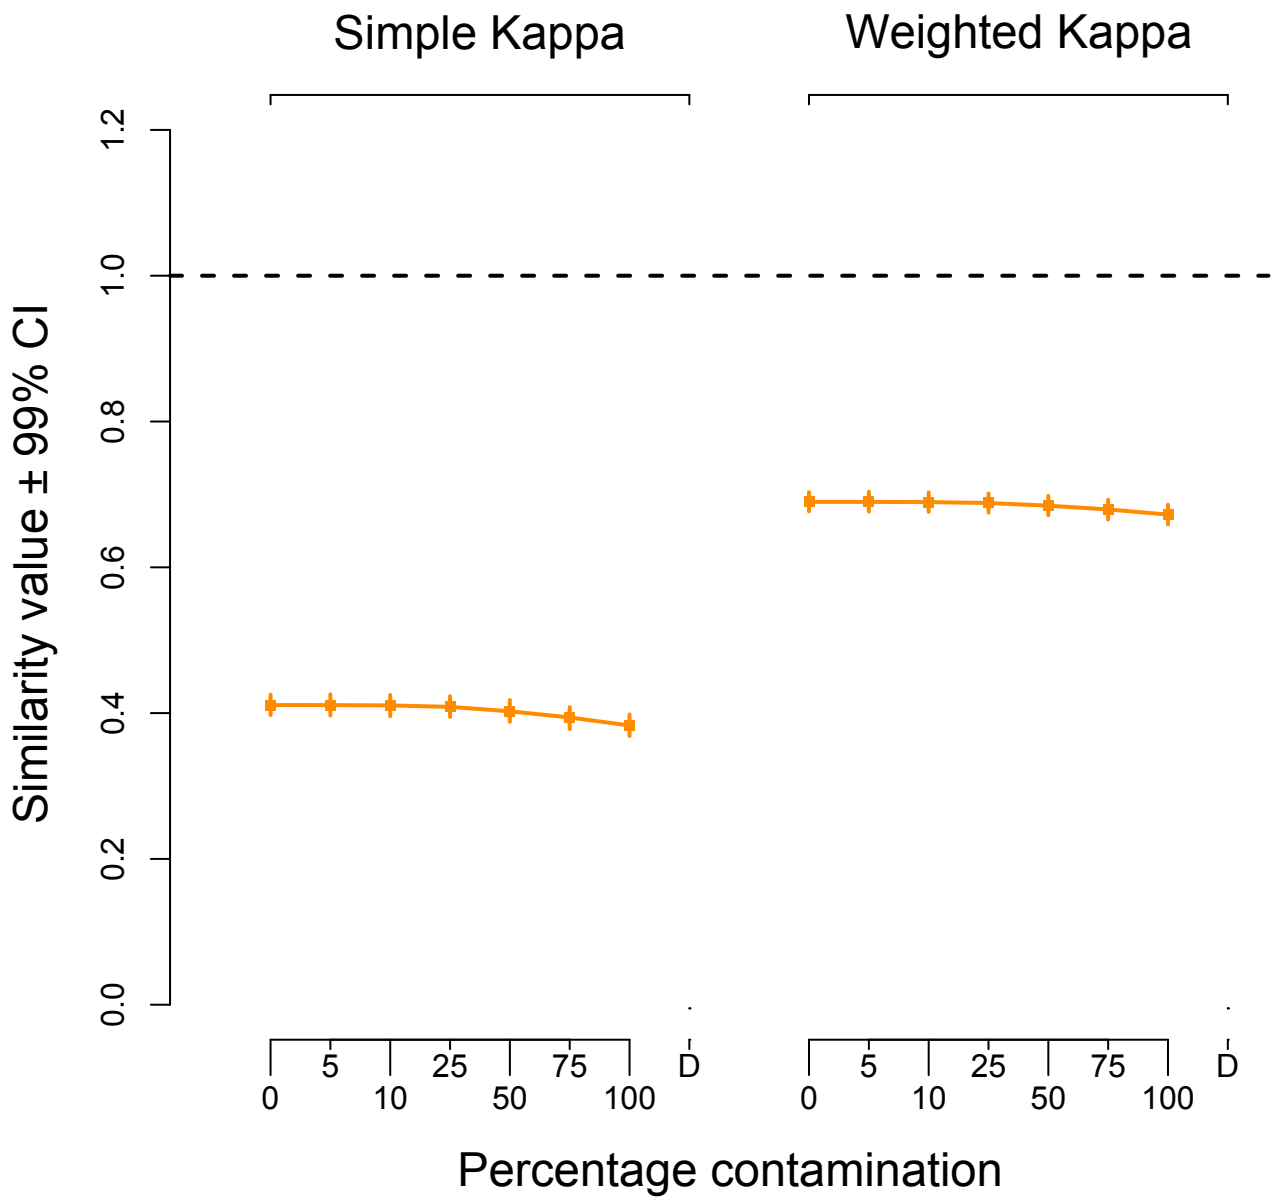

SI Figure 4 A

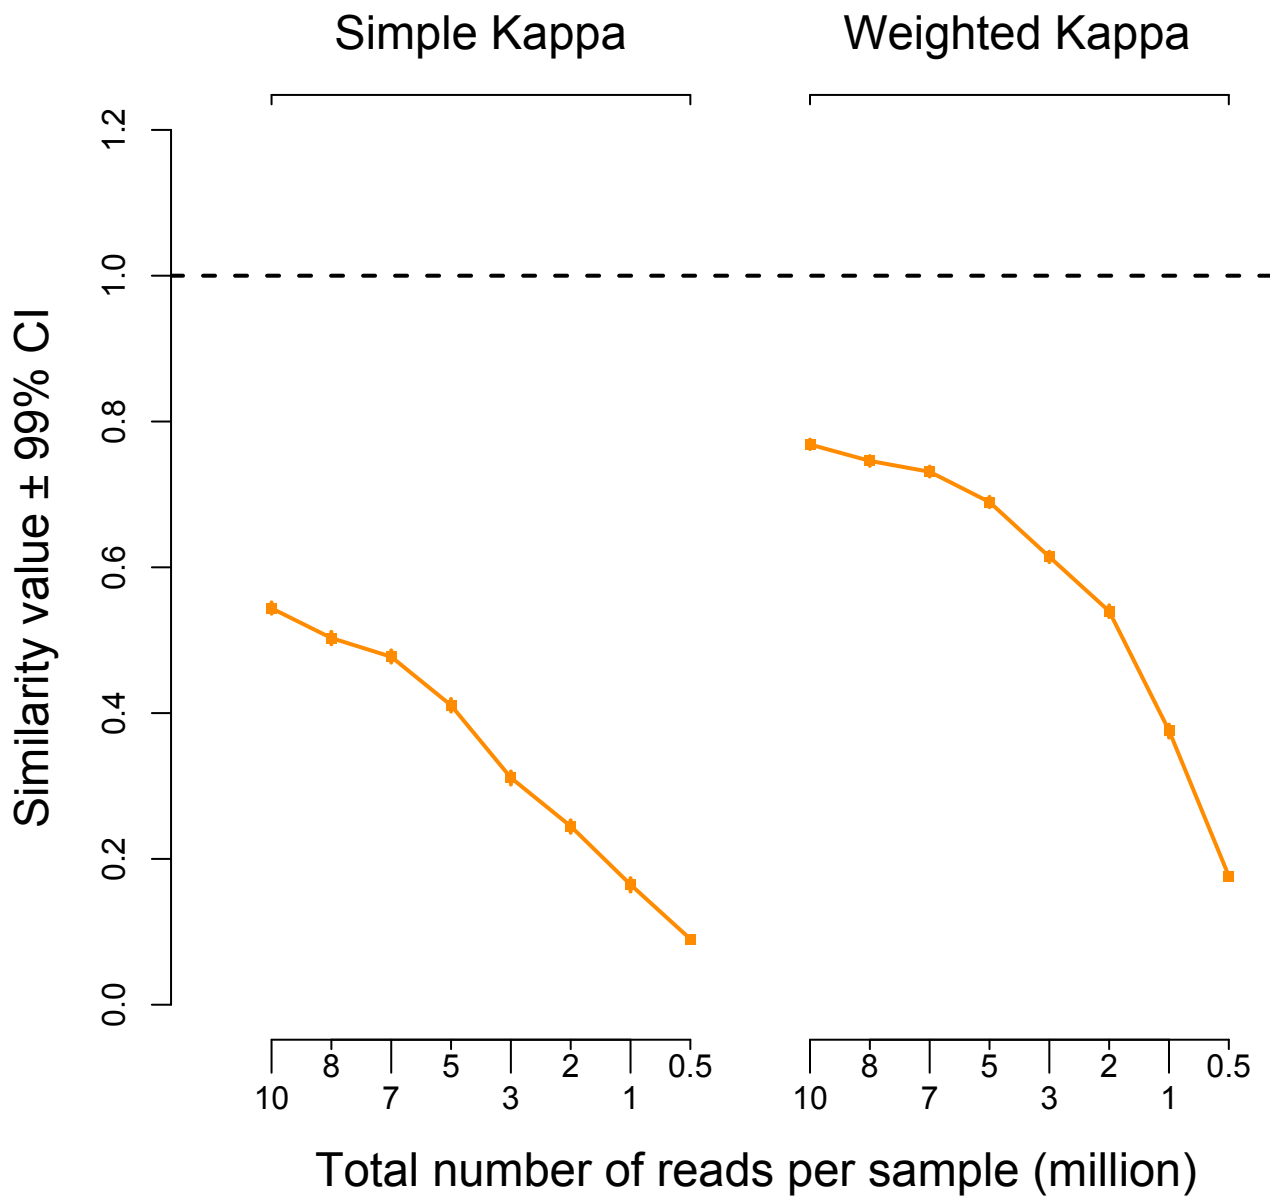

SI Figure 4 B



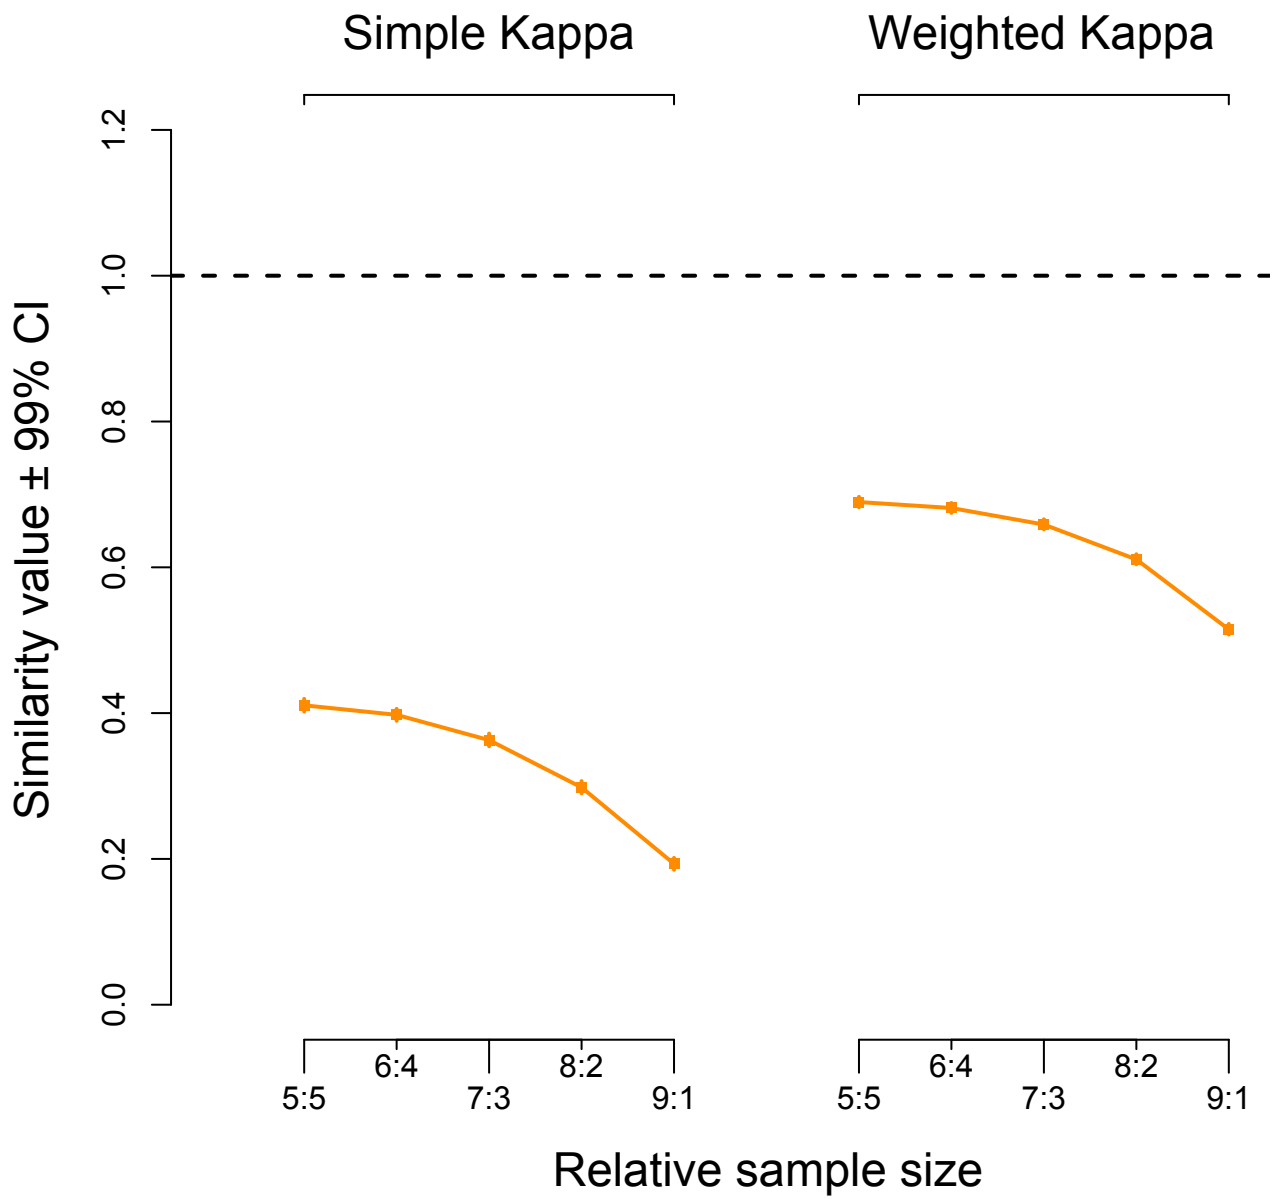

SI Figure 4 C

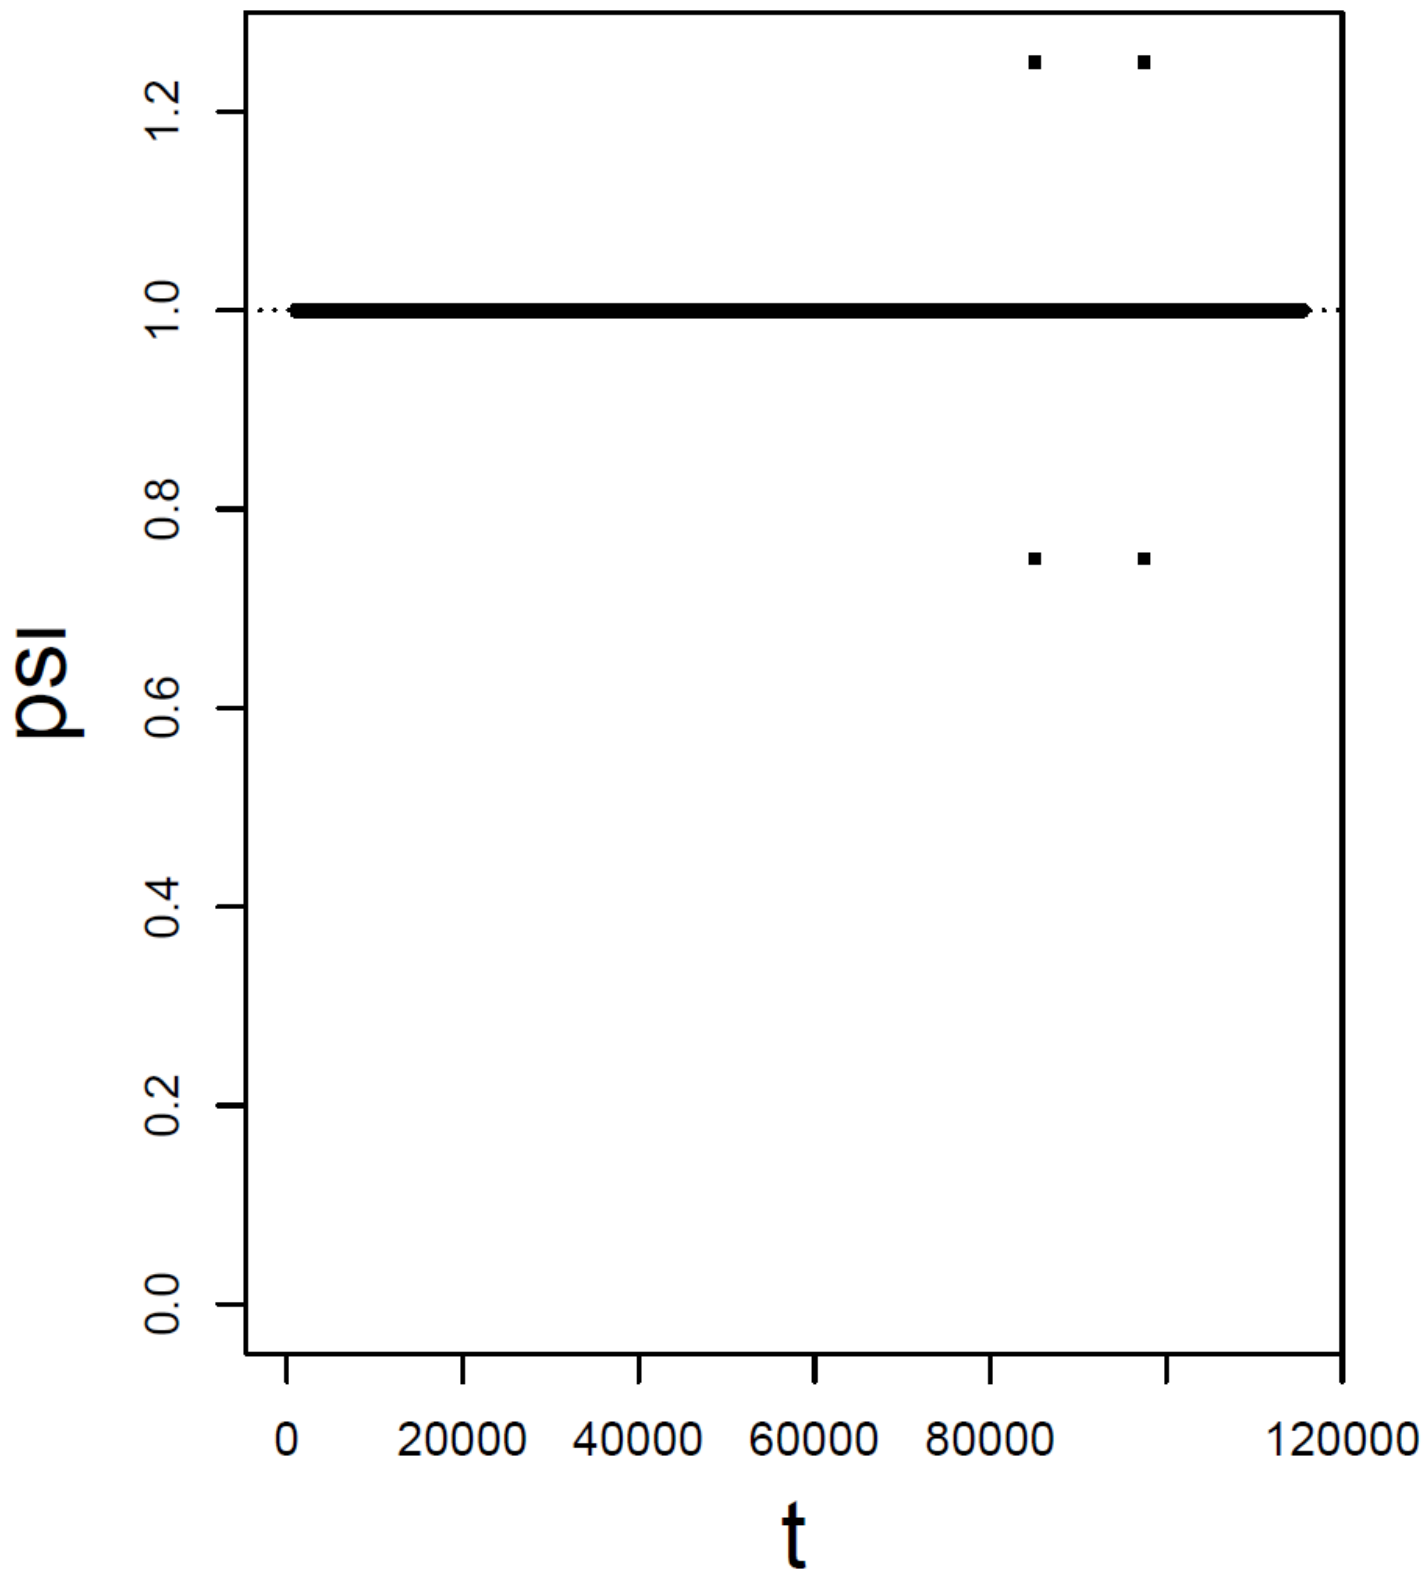

SI Figure 5

Total reads per exon  $\geq 0$

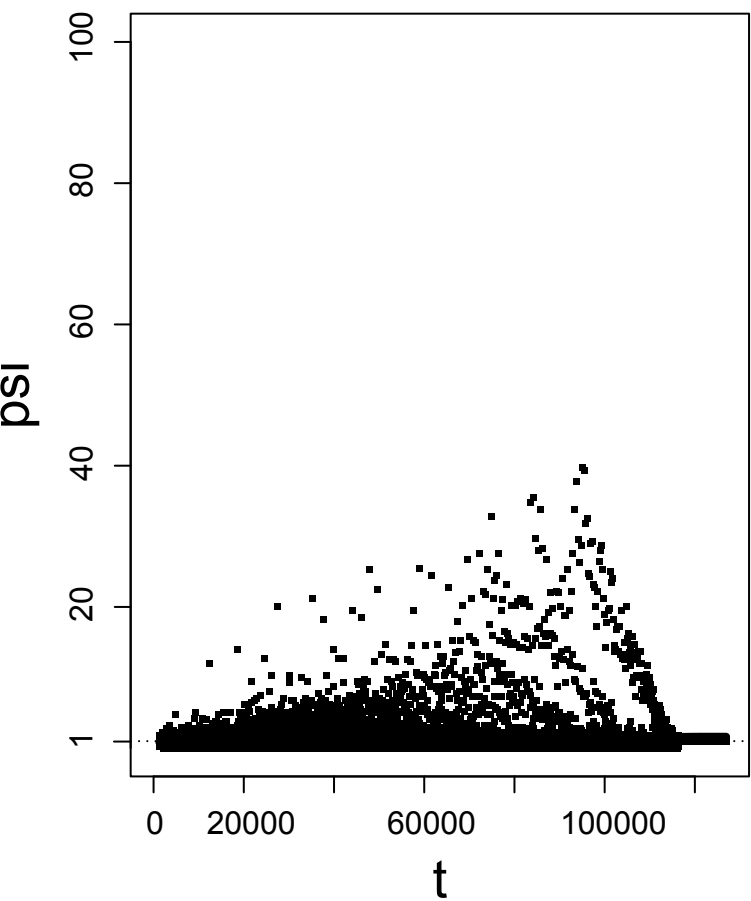

Total reads per exon  $\geq 10$

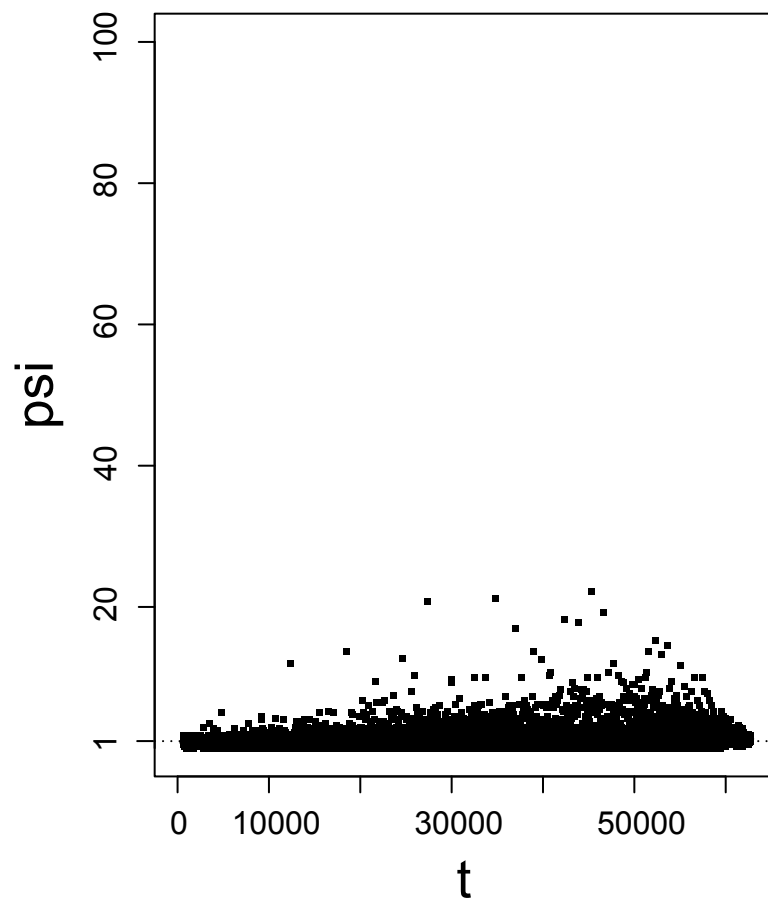

Total reads per exon  $\geq 50$

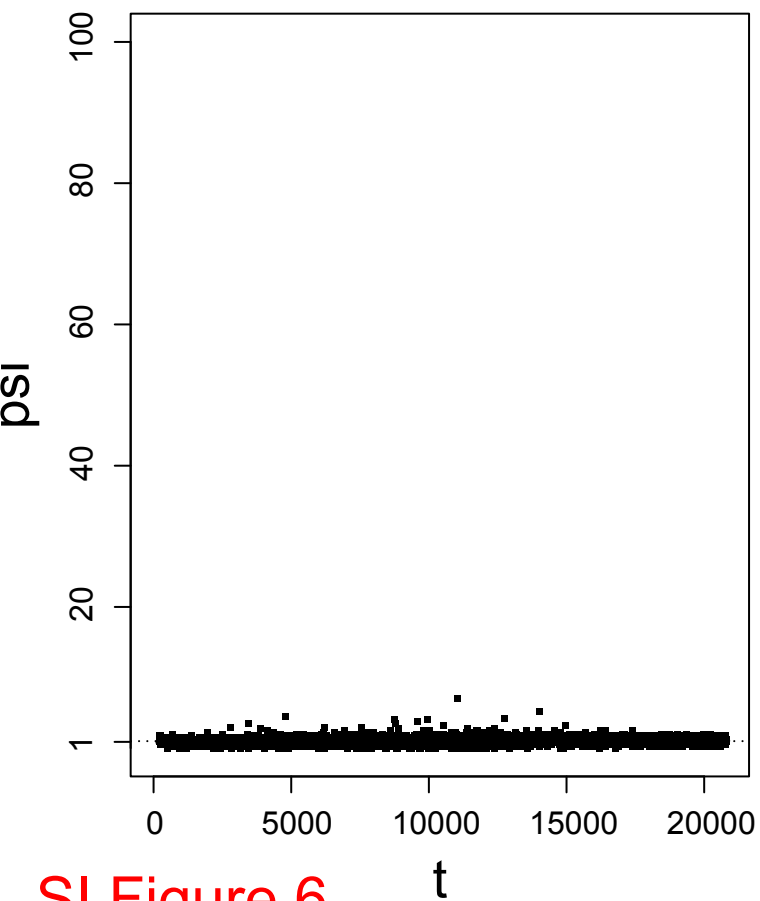

Total reads per exon  $\geq 100$

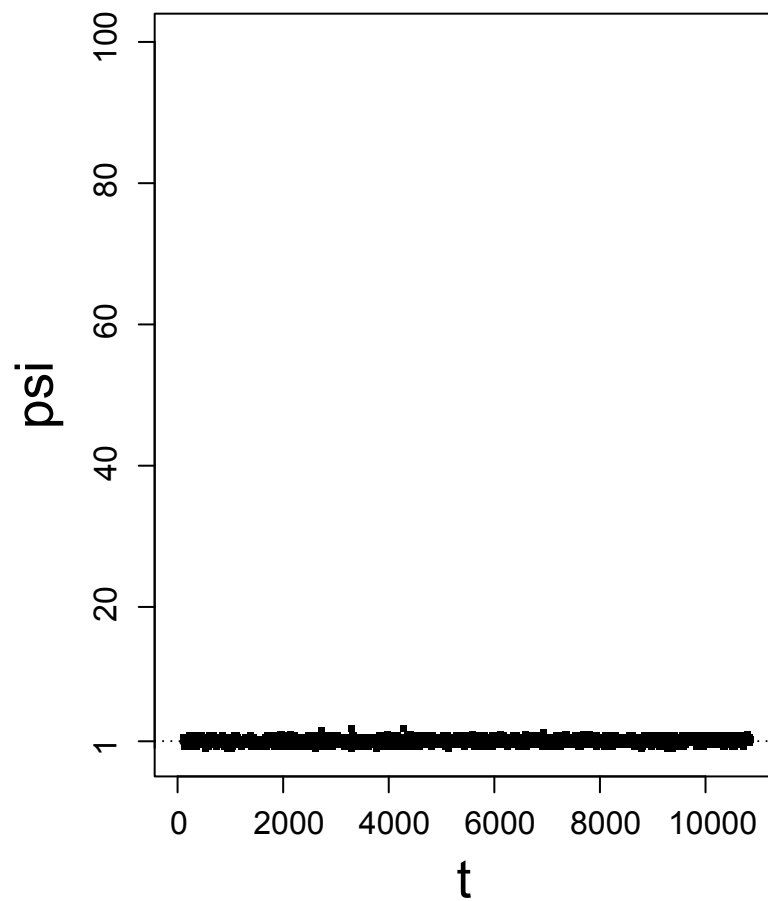

Supplement: 1471-2164-13-524-S1.pdf [file 1471-2164-13-524-S1.pdf]
